# Supplementary material for: Vestigial Is Required during Late-Stage Muscle Differentiation in Drosophila melanogaster Embryos
Source: PubMed Central journal article supplement — Mol Biol Cell. 2010 Oct 1;21(19):3304–16. doi: 10.1091/mbc.E10-04-0364 (PMC2947467; doi:10.1091/mbc.e10-04-0364), 2010-10-01
Supplement: E10-04-0364_1.pdf [file E10-04-0364_1.pdf]

**Figure S1.** The muscle detachment phenotype observed when the dominant-negative *sdΔTEA* was expressed in *rhea*<sup>1</sup> mutants was not due to the lack of localization of integrin or its known ligands. **A)** In wild type embryos, Tig (A<sup>1</sup>, red) and PS2 integrin (A<sup>2</sup>, blue) containing complexes forms a tight junction holding muscles together. (arrowhead in A<sup>3</sup>). **B)** Tig (B<sup>1</sup>, red) and PS2 integrin (B<sup>2</sup> blue) remained concentrated at the muscle cell termini and followed the detaching muscles in *rhea*<sup>1</sup> embryos where Vg activity is inhibited by *sdΔTEA* (arrows, arrowhead in B<sup>3</sup>). **C)** Tig (C<sup>1</sup>, red) and Tsp (C<sup>2</sup> blue) showed the same localization and retention at the end of detaching muscles in *rhea*<sup>1</sup> embryos where Vg activity is inhibited (arrows, arrowhead in C<sup>3</sup>). A<sup>3</sup>, B<sup>3</sup>, and C<sup>3</sup> are magnifications of the framed areas in A<sup>3</sup>, B<sup>3</sup> and C<sup>3</sup> respectively.

**Figure S2.** Loss of Vg or expression of DN-egfr or over-expression of Vg does not alter tendon cell or specific muscle cell identity. **A)** The pattern of muscles were marked by Myosin (Tadokoro *et al.*) and tendon cells in wild type embryos was visualized by staining of SrA (green), a marker for fully differentiated tendon cells. **B)**  $vg^{null};rhea^1$  double mutants did not have detectable defects in tendon cell development. **C)** The identity of VL1 muscle can be specifically marked by using a *5053-GAL4, UAS-lacZ* marker. **D)** In  $vg^{null}$  mutants, VL1 muscles were properly specified at all stages of embryonic development. **E)** The *krüppel*-expressing muscle progenitor cells can be revealed through Kr staining in stage 13 wild type embryos (arrows). **F)** These progenitor cells still express Kr when Vg was over-expressed in SMs via *Dmef2-GAL4* (arrows). **G)** In wild type embryos, the overall pattern of embryonic muscles can be observed via staining with Myosin (green). The VL1-4 muscles were identified by their position and presence of Vg (Tadokoro *et al.*), LL1 muscles are marked with arrows. **H)** Expression of DN-egfr in the muscles of developing embryos did not alter the specification of the VL muscles but muscles LL1 (arrows) and VO5-6 (arrowheads) were missing in several segments.

**Figure S3.** The altered migration of LT muscles caused by ectopic-expression of Vg is independent of the Slit-Robo guidance signals and Grip. **A)** The normal pattern of wild type muscles visualized by Actin staining (green). **B)** In embryos with the *robo*<sup>1</sup> mutation, LT muscles migrated to intrasegmental sites (arrowheads) distant from the segment border (arrow). **C)** A similar pattern of LT muscle migration to intrasegmental sites (arrowheads) distant from the segment border (arrow) as was seen in embryos with the *slit*<sup>2</sup> mutation. **D)** Ectopic-expression of Vg in wild type embryos caused LTs (arrowheads) to change their apparent migration path and attach to the segment borders (arrows). **E-F)** The *robo*<sup>1</sup> or *slit*<sup>2</sup> did not alter this apparent aberrant migration. **G)** In some segments, ectopic-expression of Robo1 produced a phenotype similar to ectopic Vg, with LT1 muscles (arrowheads) moving to the segment borders (arrowheads). **H)** Expression of Robo1 in all developing muscle cells in *vg*<sup>null</sup> mutant embryos produced a similar phenotype. **I)** Removing *grip* function in muscles cells ectopically expressing Vg did not significantly alter the phenotype induced by over-expression of Vg alone compared to (D).

**Figure S4. A-A')** The *ap*-GAL4 line induces expression only in muscle LT1-4 and VA2 at similar levels as detected by an UAS-*lacZ* reporter. Dmef2 staining reveals all nuclei of somatic muscles (green). A and A' show different channels of the same confocal image and so as B and B', C and C'. **B-B')** Expression of UAS-*vg2* via *ap*-GAL4 produced ectopic adhesions between VA2 and LT muscles (arrowheads), but not between VA1 and LT muscles. Insets are the close-ups of the area framed by dotted lines. **C-C')** These ectopic adhesions disappeared when the DN-*egfr* was co-expressed with Vg (arrowheads).

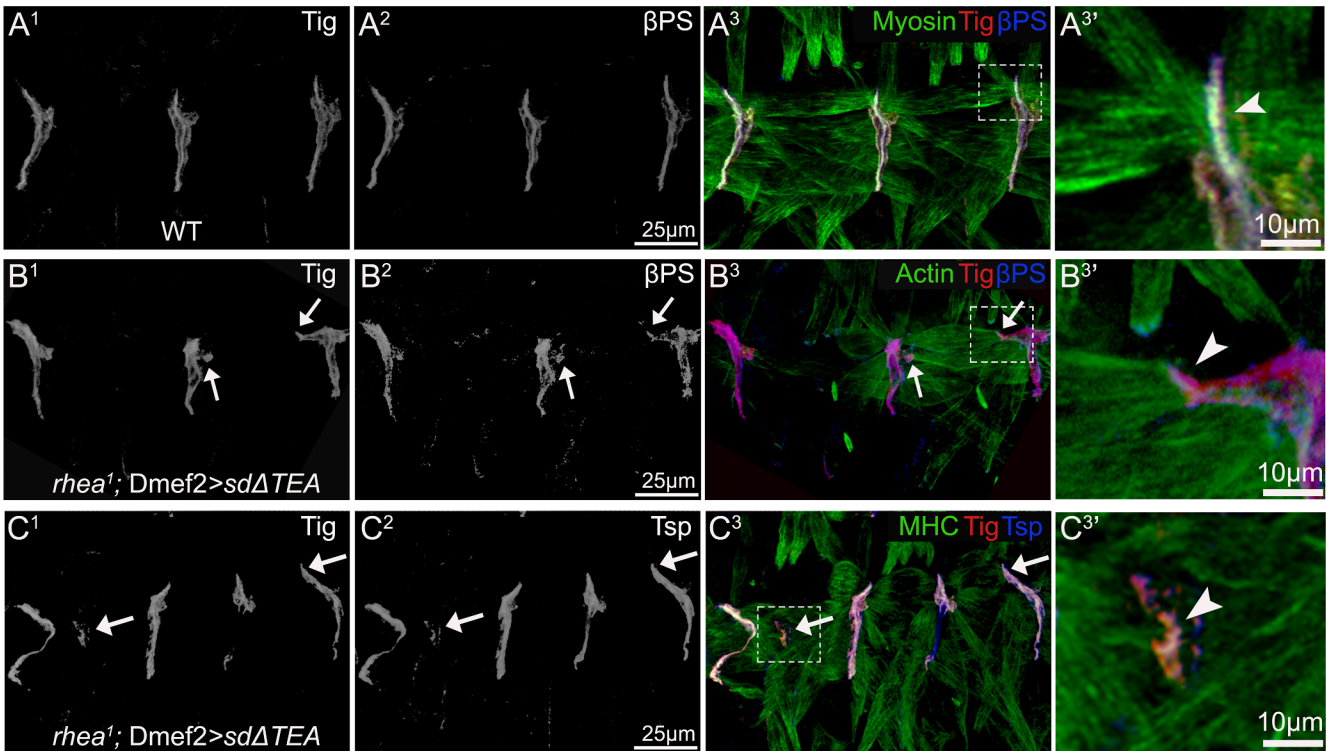

Figure S1

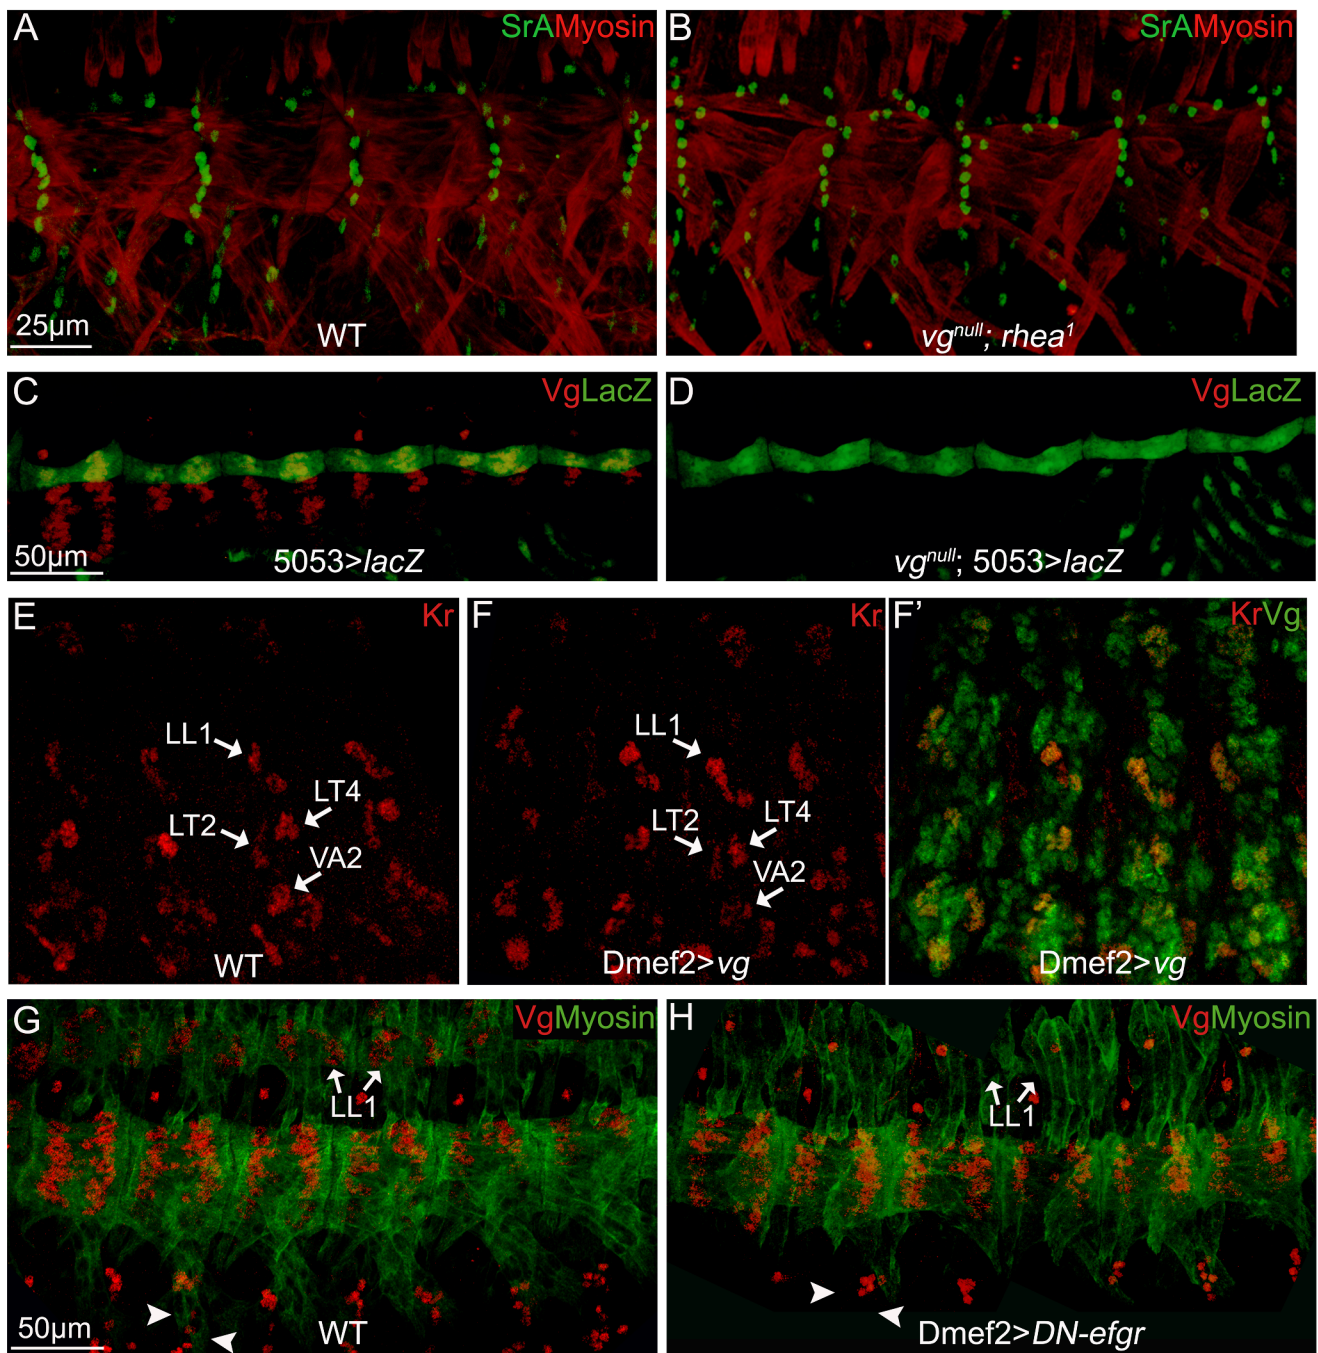

Figure S2

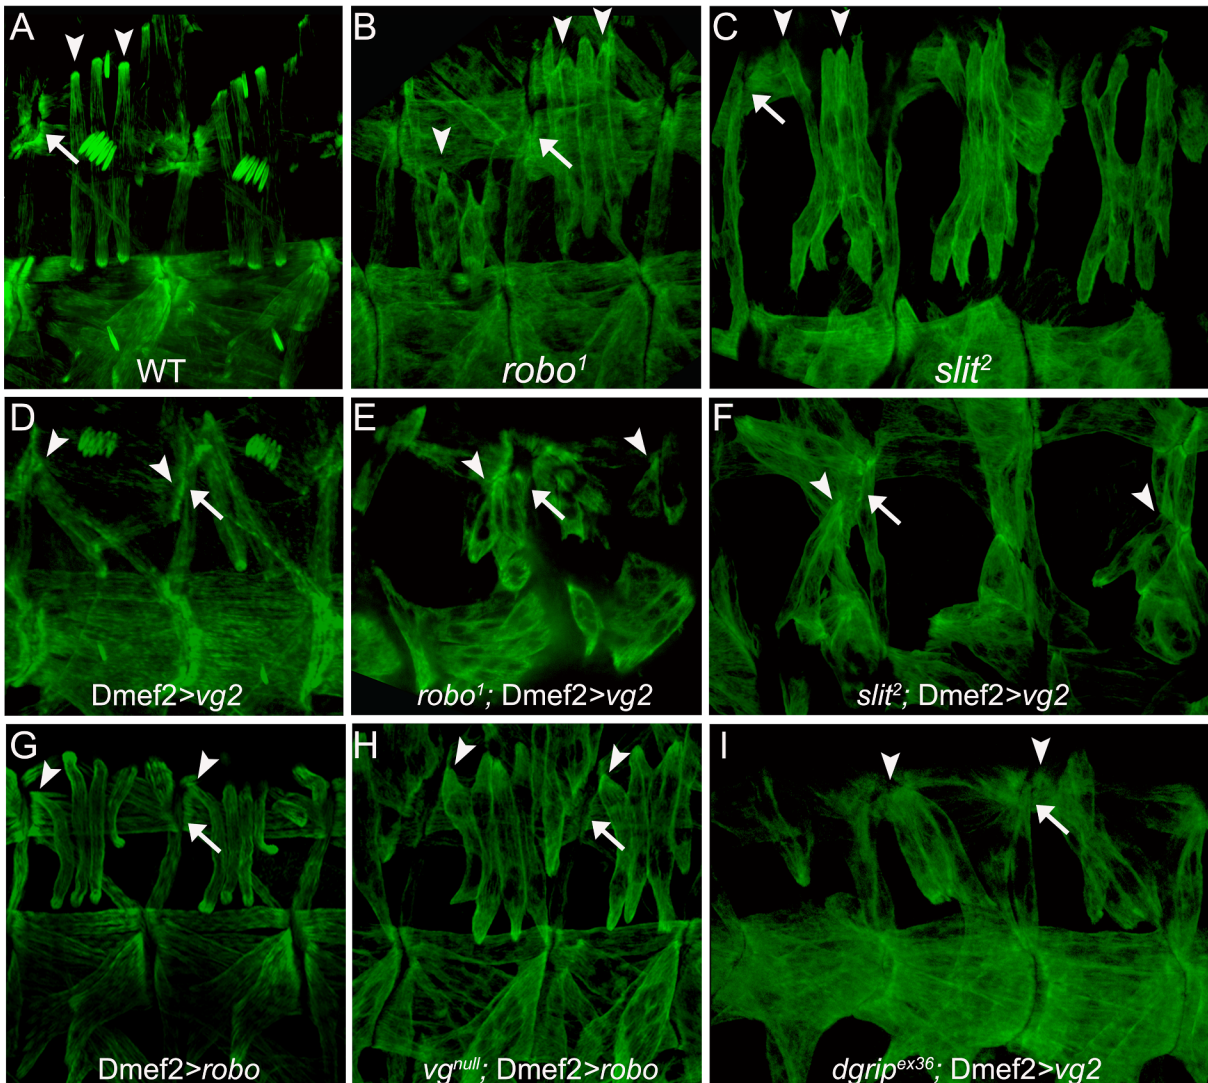

Figure S3

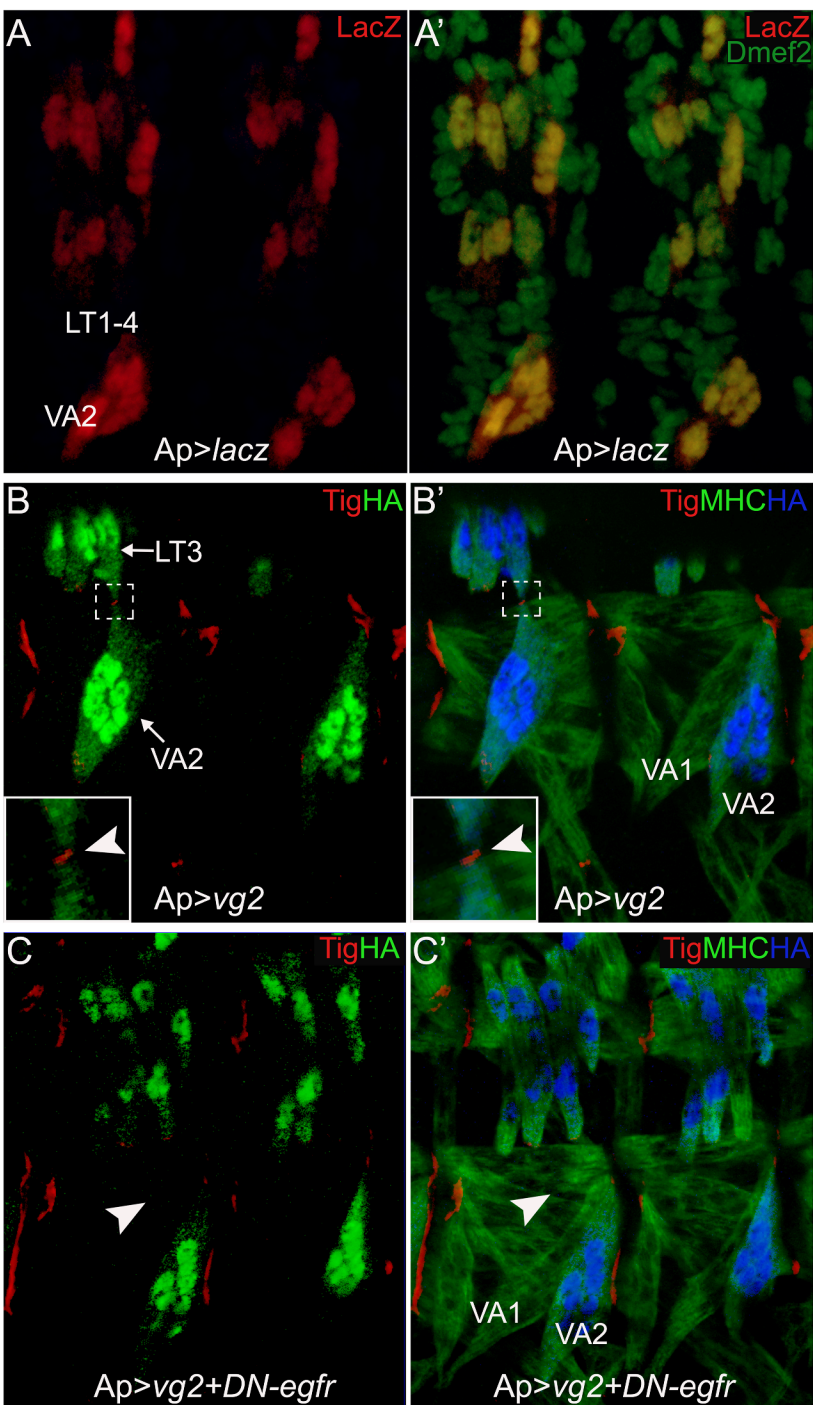

Figure S4
